# Supplementary material for: Non-Targeted Metabolomics Combined with Chemometrics by UHPLC–Orbitrap–HRMS and Antioxidant Activity of Atractylodes chinensis (DC.) Koidez. from Eight Origins
Source: MDPI journal article supplement (doi:10.3390/metabo13080888), 2023-07-27
Supplement: s1 [file s1]

# Supplementary Material

## Non-Targeted Metabolomics Combined with Chemometrics by UHPLC–Orbitrap–HRMS and Antioxidant Activity of *Atractylodes chinensis* (DC.) Koidez. from Eight Origins

Xueyan Gao <sup>1,2,3</sup>, Danyang Ma <sup>1,2,3</sup>, Kaiyuan Li <sup>1,2,3</sup>, Tianjiao Xing <sup>1,2,3</sup>, Xiwu Liu <sup>4</sup>, Lingfeng Peng <sup>1,2,3</sup>, Dawei Chen <sup>5,\*</sup> and Zhihui Hao <sup>1,2,3,\*</sup>

<sup>1</sup> Chinese Veterinary Medicine Innovation Center, College of Veterinary Medicine, China Agricultural University, Beijing 100193, China

<sup>2</sup> Key Biology Laboratory of Chinese Veterinary Medicine, Ministry of Agriculture and Rural Affairs, Beijing 100193, China

<sup>3</sup> National Center of Technology Innovation for Medicinal Function of Food, National Food and Strategic Reserves Administration, Beijing 100193, China

<sup>4</sup> Qingdao Animal Husbandry Workstation, Qingdao 266100, China

<sup>5</sup> NHC Key Laboratory of Food Safety Risk Assessment, Chinese Academy of Medical Science Research Unit (No. 2019RU014), China National Center for Food Safety Risk Assessment, Beijing 100021, China

\* Correspondence: chendw@cfsa.net.cn (D.C.); haozhihui@cau.edu.cn (Z.H.)

## List of Tables and Figures

Table S1. Mass spectrometry identification results of chemical constituents of *Atractylodes chinensis* (DC.) Koidez.

Table S2. List of the characteristic compounds to discriminate AC according to the geographical origin

Figure S1. The total ion chromatograms of the UHPLC-Orbitrap-HRMS analysis of *Atractylodes chinensis* (DC.) Koidez. samples, with a focus on the (a) negative ion and (b) positive ion.

Figure S2. The chemical structure of 76 compounds identified in this study.

Figure S3. Mass spectrometric fragmentation patterns of (a) Adenosine, (b) L-Phenylalanine, and (c) Scopoletin.

Figure S4. OPLS-DA results of AC from 8 different regions with grouping.

Table S1. Mass spectrometry identification results of chemical constituents of *Atractylodes chinensis* (DC.) Koidez.

| No. | Name                     | Formula                                                       | Ionmode | RT<br>[min] | Error<br>[ppm] | MS fragment<br>[m/z] | Calculate. MW | MS <sup>2</sup> fragments [m/z]                                                     | Classification   |
|-----|--------------------------|---------------------------------------------------------------|---------|-------------|----------------|----------------------|---------------|-------------------------------------------------------------------------------------|------------------|
| 1   | L-Tyrosine               | C <sub>9</sub> H <sub>11</sub> NO <sub>3</sub>                | +       | 2.041       | -2.27          | 182.08104            | 181.0735      | 165.05469, 147.04419, 136.07579, 123.04431, 119.04945, 91.05481                     | Amino acids      |
| 2   | Adenosine                | C <sub>10</sub> H <sub>13</sub> N <sub>5</sub> O <sub>4</sub> | +       | 2.094       | -3.37          | 268.10333            | 267.0959      | 136.06184, 119.03561, 85.0291, 57.0342                                              | Alkaloids        |
| 3   | 2'-Deoxyadenosine        | C <sub>10</sub> H <sub>13</sub> N <sub>5</sub> O <sub>3</sub> | +       | 2.165       | -2.91          | 252.1084             | 251.1011      | 136.06184, 119.03565, 117.05501, 99.04454, 73.02895                                 | Alkaloids        |
| 4   | Guanosine                | C <sub>10</sub> H <sub>13</sub> N <sub>5</sub> O <sub>5</sub> | +       | 2.193       | -3.25          | 284.09796            | 283.0908      | 153.04205, 152.05663, 135.03020, 110.0351, 109.0513                                 | Alkaloids        |
| 5   | Guanine                  | C <sub>5</sub> H <sub>5</sub> N <sub>5</sub> O                | +       | 2.194       | -2.36          | 152.05635            | 151.0491      | 135.03018, 110.03527, 109.05110, 69.0342                                            | Alkaloids        |
| 6   | 2-Furoic acid            | C <sub>5</sub> H <sub>4</sub> O <sub>3</sub>                  | +       | 2.525       | -3.07          | 113.02352            | 112.0163      | 97.02898, 95.01339, 85.02930, 73.02917, 69.03438, 67.01877, 57.03429                | Organic acids    |
| 7   | L-Isoleucine             | C <sub>6</sub> H <sub>13</sub> NO <sub>2</sub>                | +       | 2.565       | -2.21          | 132.10175            | 131.0943      | 86.09708, 84.08158, 69.07080                                                        | Amino acids      |
| 8   | Chlorogenic acid*        | C <sub>16</sub> H <sub>18</sub> O <sub>9</sub>                | -       | 3.162       | 0.04           | 353.08789            | 354.0951      | 191.05499, 179.03365, 173.04413, 135.04353, 109.02770, 93.03292, 87.00679, 59.01215 | Phenylpropanoids |
|     |                          |                                                               | +       | 7.681       | -2.84          | 355.10138            | 354.09408     | 163.03859, 117.03361, 145.02820                                                     |                  |
| 9   | Vanillic acid            | C <sub>8</sub> H <sub>8</sub> O <sub>4</sub>                  | +       | 3.912       | -1.64          | 169.04924            | 168.042       | 155.03383, 141.05455, 139.03888, 127.03941, 111.04434, 93.03393, 81.03397, 65.03938 | Phenols          |
| 10  | L-Phenylalanine          | C <sub>9</sub> H <sub>11</sub> NO <sub>2</sub>                | +       | 4.07        | -2.3           | 166.08592            | 165.0786      | 131.04950, 120.08102, 103.05472, 93.07050, 91.05493, 79.0549                        | Amino acids      |
| 11  | 3-p-Coumaroylquinic acid | C <sub>16</sub> H <sub>18</sub> O <sub>8</sub>                | -       | 4.474       | 1.46           | 337.09341            | 338.1007      | 191.05496, 163.03871, 119.04863, 93.03274                                           | Phenylpropanoids |
|     |                          |                                                               | +       | 9.597       | -1.87          | 339.10681            | 338.09955     | 215.06976, 148.04713, 147.04376, 119.04919,                                         |                  |
| 12  | Cryptochlorogenic acid   | C <sub>16</sub> H <sub>18</sub> O <sub>9</sub>                | -       | 5.131       | 0.05           | 353.0878             | 354.0951      | 191.05505, 179.03375, 173.04424, 135.04352, 93.03278, 85.02778                      | Phenylpropanoids |
|     |                          |                                                               | +       | 8.198       | -2.07          | 355.10162            | 354.09408     | 181.04922, 163.03868, 119.04919, 117.03361                                          |                  |
| 13  | Neochlorogenic acid*     | C <sub>16</sub> H <sub>18</sub> O <sub>9</sub>                | +       | 5.846       | -2.84          | 355.10159            | 354.0941      | 193.04901, 163.03893, 145.02802, 135.04422, 117.03379, 107.04957                    | Phenylpropanoids |
|     |                          |                                                               | -       | 3.029       | 0.49           | 353.0881             | 354.09525     | 191.05522, 179.03384, 135.04356, 134.03581                                          |                  |
| 14  | 5-O-Feruloylquinic acid  | C <sub>17</sub> H <sub>20</sub> O <sub>9</sub>                | -       | 6.015       | 0.33           | 367.10342            | 368.1109      | 193.04924, 191.05504, 173.04359, 155.03311, 134.03568, 93.03281, 87.00692           | Phenylpropanoids |

| No. | Name                                             | Formula                                                       | Ionmode | RT<br>[min] | Error<br>[ppm] | MS fragment<br>[m/z] | Calculate. MW | MS <sup>2</sup> fragments [m/z]                                                       | Classification   |
|-----|--------------------------------------------------|---------------------------------------------------------------|---------|-------------|----------------|----------------------|---------------|---------------------------------------------------------------------------------------|------------------|
| 15  | Indole-3-acrylic acid                            | C <sub>11</sub> H <sub>9</sub> NO <sub>2</sub>                | +       | 6.293       | -2.11          | 188.07022            | 187.0629      | 170.0604, 146.06007, 144.08092, 143.07344, 118.06543, 117.07003, 115.05456, 91.05455  | Miscellaneous    |
| 16  | D-Tryptophan                                     | C <sub>11</sub> H <sub>12</sub> N <sub>2</sub> O <sub>2</sub> | +       | 6.294       | -2.51          | 205.09665            | 204.0894      | 188.07066, 146.06004, 144.08080, 118.06543, 132.08089, 130.06517, 115.05450, 91.05484 | Amino acids      |
|     |                                                  |                                                               | -       | 5.032       | 1.24           | 203.08176            | 204.08894     | 159.09151, 142.06470, 117.05414, 116.04893,                                           |                  |
| 17  | 4-p-Coumaroylquinic acid                         | C <sub>16</sub> H <sub>18</sub> O <sub>8</sub>                | -       | 6.443       | 1.29           | 337.09329            | 338.1006      | 173.04424, 163.03841, 119.04894, 93.03278, 67.01717                                   | Phenylpropanoids |
|     |                                                  |                                                               | +       | 10.153      | -1.78          | 339.10684            | 338.09954     | 215.06981, 197.05927, 169.06445, 147.04376                                            |                  |
| 18  | Phellavin                                        | C <sub>26</sub> H <sub>32</sub> O <sub>12</sub>               | -       | 7.473       | 0.5            | 535.18213            | 536.1896      | 373.12866, 109.02774, 89.02255, 71.01205                                              | Flavonoids       |
| 19  | 4-O-Feruloylquinic acid                          | C <sub>17</sub> H <sub>20</sub> O <sub>9</sub>                | -       | 7.613       | 0.29           | 367.10336            | 368.1108      | 193.04948, 173.04424, 134.03571, 117.03310, 93.03280, 67.01711, 59.01212              | Phenylpropanoids |
|     |                                                  |                                                               | +       | 10.812      | -2.14          | 369.11722            | 368.11005     | 177.05415, 149.05942, 145.02815, 117.03344                                            |                  |
| 20  | Caffeic acid                                     | C <sub>9</sub> H <sub>8</sub> O <sub>4</sub>                  | +       | 7.882       | -2.33          | 181.04918            | 180.0418      | 179.03421, 163.03888, 137.05957, 135.04413, 117.03366, 107.04984, 91.05464, 89.03927  | Phenols          |
| 21  | 3-O-Feruloylquinic acid                          | C <sub>17</sub> H <sub>20</sub> O <sub>9</sub>                | +       | 8.31        | -1.69          | 369.11688            | 368.1101      | 177.05447, 149.05972, 145.02835, 133.02855, 117.03381                                 | Phenylpropanoids |
|     |                                                  |                                                               | -       | 5.672       | 0.28           | 367.10349            | 368.11083     | 193.04955, 191.03397, 175.03868, 173.04427, 149.05928                                 |                  |
| 22  | Icariside F2                                     | C <sub>18</sub> H <sub>26</sub> O <sub>10</sub>               | -       | 9.624       | 0.48           | 401.14536            | 402.1528      | 113.02279, 99.00706, 83.01206, 73.02779, 71.01208, 59.01209                           | Phenols          |
| 23  | ar-Turmerone                                     | C <sub>15</sub> H <sub>20</sub> O                             | +       | 10.328      | -2.9           | 217.15807            | 216.1508      | 189.16357, 175.14807, 145.10118, 133.10124, 119.08582, 105.07043, 95.08601, 81.07056  | Terpenoids       |
| 24  | 4,6,2',4'-Tetramethoxychalcone 2'-beta-glucoside | C <sub>25</sub> H <sub>30</sub> O <sub>11</sub>               | -       | 10.985      | 1              | 505.17175            | 506.1793      | 487.16052, 475.15967, 343.11899, 89.02265, 59.01197                                   | Flavonoids       |
| 25  | D-Camphor                                        | C <sub>10</sub> H <sub>16</sub> O                             | +       | 11.452      | -2.27          | 153.127              | 152.1198      | 135.11683, 125.05998, 109.10164, 107.08600, 93.03409, 81.07062, 67.05423, 65.03938    | Terpenoids       |
| 26  | Syringaldehyde                                   | C <sub>9</sub> H <sub>10</sub> O <sub>4</sub>                 | +       | 11.628      | -2.33          | 183.06477            | 182.0575      | 155.07031, 140.04678, 125.02361, 123.04424, 95.04968, 81.03426, 65.03938, 55.01874    | Phenols          |

| No. | Name                                                                             | Formula                                                    | Ionmode | RT<br>[min] | Error<br>[ppm] | MS fragment<br>[m/z] | Calculate. MW | MS <sup>2</sup> fragments [m/z]                                                           | Classification   |
|-----|----------------------------------------------------------------------------------|------------------------------------------------------------|---------|-------------|----------------|----------------------|---------------|-------------------------------------------------------------------------------------------|------------------|
| 27  | 4-Formylphenyl<br>ribopyranoside                                                 | beta-D-<br>C <sub>12</sub> H <sub>14</sub> O <sub>6</sub>  | +       | 11.866      | -3.36          | 255.08545            | 254.0782      | 227.09103, 195.06525, 177.05466, 167.07024, 123.04405, 107.0493, 79.05488,<br>71.04996    | Glycosides       |
| 28  | Icariside D1                                                                     | C <sub>19</sub> H <sub>28</sub> O <sub>10</sub>            | -       | 11.966      | 0.81           | 415.16135            | 416.1686      | 191.05492, 113.02245, 99.00703, 89.02268, 72.99126                                        | Glycosides       |
| 29  | Scopoletin                                                                       | C <sub>10</sub> H <sub>8</sub> O <sub>4</sub>              | +       | 12.102      | -2.58          | 193.04893            | 192.0418      | 178.02605, 165.05510, 150.03107, 149.05988, 137.05975, 133.02850, 122.03655               | Phenylpropanoids |
| 30  | Abscisic acid                                                                    | C <sub>15</sub> H <sub>20</sub> O <sub>4</sub>             | -       | 12.227      | -0.3           | 263.12285            | 264.1361      | 245.11740, 219.13812, 203.10664, 201.12767, 163.11142, 161.09605, 135.07957               | Terpenoids       |
| 31  | Ferulic acid                                                                     | C <sub>10</sub> H <sub>10</sub> O <sub>4</sub>             | +       | 12.343      | -2.2           | 195.06487            | 194.0575      | 193.04985, 177.05466, 149.05969, 145.02847, 117.03382, 91.05466, 89.03918                 | Phenylpropanoids |
| 32  | Dehydrodiisoeugenol                                                              | C <sub>20</sub> H <sub>22</sub> O <sub>4</sub>             | +       | 12.39       | -2.67          | 327.15826            | 326.1509      | 295.13275, 175.07626, 163.07530, 137.05972, 133.06473, 131.04929,<br>122.03649, 105.07018 | Lignans          |
| 33  | (5S,6S)-5-hydroxy-4-methoxy-6-(2-<br>phenylethyl)-5,6-dihydro-2H-pyran-<br>2-one | C <sub>14</sub> H <sub>16</sub> O <sub>4</sub>             | +       | 12.422      | -3.3           | 249.11139            | 248.104       | 204.7819, 187.07530, 159.08058, 131.08563, 129.07022, 105.07033, 93.07023,<br>91.05471    | Lactones         |
| 34  | Isofraxidin                                                                      | C <sub>11</sub> H <sub>10</sub> O <sub>5</sub>             | +       | 12.907      | -3.19          | 223.05937            | 222.0521      | 190.02608, 179.03410, 163.03908, 162.03108, 135.04410, 134.03612,<br>107.04955, 91.05439  | Phenylpropanoids |
| 35  | Isochlorogenic acid B*                                                           | C <sub>25</sub> H <sub>24</sub> O <sub>12</sub>            | +       | 14.549      | -1.65          | 517.133              | 516.1259      | 499.12405, 337.09216, 319.08051, 163.03889, 135.04414, 117.03378, 107.04945               | Phenylpropanoids |
|     |                                                                                  |                                                            | -       | 11.561      | 0.31           | 515.11945            | 516.12694     | 353.08810, 191.03384, 179.03369, 173.08041, 135.04355                                     |                  |
| 36  | Isochlorogenic acid A*                                                           | C <sub>25</sub> H <sub>24</sub> O <sub>12</sub>            | +       | 14.8        | -1.35          | 517.13336            | 516.1261      | 449.12115, 337.09009, 319.08017, 163.03889, 135.04411, 117.03378, 89.03913                | Phenylpropanoids |
|     |                                                                                  |                                                            | -       | 10.349      | 0.46           | 515.1193             | 516.12702     | 353.08786, 191.03386, 179.03375, 173.04428, 135.04352                                     |                  |
| 37  | Isochlorogenic acid C                                                            | C <sub>25</sub> H <sub>24</sub> O <sub>12</sub>            | +       | 15.942      | -1.23          | 517.1333             | 516.1261      | 500.12924, 449.12418, 163.03893, 135.04416, 117.03381, 107.04971                          | Phenylpropanoids |
|     |                                                                                  |                                                            | -       | 9.187       | 0.28           | 515.11957            | 516.12692     | 353.08807, 335.07858, 173.08076                                                           |                  |
| 38  | Wikstromol                                                                       | C <sub>20</sub> H <sub>22</sub> O <sub>7</sub>             | +       | 16.088      | -2.42          | 375.14282            | 374.1357      | 357.13229, 345.13348, 325.10831, 161.05962, 137.05969, 107.04948, 91.05465,<br>73.02914   | Lignans          |
| 39  | 2-[(2S)-6-Hydroxy-6-methyl-2-<br>heptanyl]-5-methylphenyl<br>glucopyranoside     | alpha-D-<br>C <sub>21</sub> H <sub>34</sub> O <sub>7</sub> | +       | 16.677      | -3.16          | 399.23642            | 398.2292      | 219.17441, 163.11218, 135.08078, 111.08079, 109.10167, 85.02901, 69.03426                 | Glycosides       |

| No. | Name                                                                                                            | Formula                                         | Ionmode | RT<br>[min] | Error<br>[ppm] | MS fragment<br>[m/z] | Calculate. MW | MS <sup>2</sup> fragments [m/z]                                                       | Classification   |
|-----|-----------------------------------------------------------------------------------------------------------------|-------------------------------------------------|---------|-------------|----------------|----------------------|---------------|---------------------------------------------------------------------------------------|------------------|
| 40  | Pinoresinol 4-O-glucoside                                                                                       | C <sub>26</sub> H <sub>32</sub> O <sub>11</sub> | -       | 16.858      | 0.17           | 519.18707            | 520.1946      | 357.13440, 342.11038, 122.03571, 121.02775, 83.01205, 71.01198, 59.01201              | Lignans          |
| 41  | Curcolonol                                                                                                      | C <sub>15</sub> H <sub>20</sub> O <sub>4</sub>  | +       | 17.116      | -3.33          | 265.14249            | 264.1353      | 229.12241, 211.11171, 201.12691, 161.05969, 149.05952, 107.04958, 81.07051            | Terpenoids       |
| 42  | (1S,2S)-1-(4-Hydroxy-3-methoxyphenyl)-2-{4-[(1E)-3-hydroxy-1-propen-1-yl]-2,6-dimethoxyphenoxy}-1,3-propanediol | C <sub>21</sub> H <sub>26</sub> O <sub>8</sub>  | +       | 17.396      | -1.8           | 407.16931            | 406.162       | 193.08591, 150.06783, 149.05981, 133.06496, 118.04189, 107.04964, 91.05482, 79.05488  | Miscellaneous    |
| 43  | 7-methoxy-2-methyl-2-(4-methylpent-3-enyl)-2H-chromene                                                          | C <sub>17</sub> H <sub>22</sub> O <sub>2</sub>  | +       | 17.442      | -2.61          | 259.16852            | 258.1613      | 203.10684, 189.09143, 161.05980, 137.05981, 111.08081, 109.10146, 81.07052, 79.05479  | Miscellaneous    |
| 44  | Reynosin                                                                                                        | C <sub>15</sub> H <sub>20</sub> O <sub>3</sub>  | +       | 17.571      | -4.56          | 249.14758            | 248.1401      | 213.12767, 185.13254, 157.10129, 133.10159, 67.05490                                  | Terpenoids       |
| 45  | 6-Prenylcatechin                                                                                                | C <sub>20</sub> H <sub>22</sub> O <sub>6</sub>  | -       | 17.604      | 0.4            | 357.13431            | 358.1418      | 339.12311, 150.03050, 108.01985                                                       | Flavonoids       |
| 46  | 7-(3,4-dihydroxyphenyl)-5-hydroxy-1-(4-hydroxyphenyl)heptan-3-one                                               | C <sub>19</sub> H <sub>22</sub> O <sub>5</sub>  | +       | 17.614      | -3.25          | 331.15292            | 330.1457      | 313.14316, 287.12796, 255.10132, 151.07541, 137.05971, 122.03635, 91.05486            | Phenols          |
| 47  | Carpinontriol B                                                                                                 | C <sub>19</sub> H <sub>20</sub> O <sub>6</sub>  | +       | 18.771      | -2.53          | 345.13248            | 344.1251      | 299.09189, 269.07941, 239.10619, 223.07516, 198.06816, 137.05914                      | Phenols          |
| 48  | (1S,2R)-2-methyl-1,2,3,4-tetrahydronaphthalen-1-ol                                                              | C <sub>11</sub> H <sub>14</sub> O               | +       | 19.478      | -3.05          | 163.11125            | 162.104       | 145.10133, 131.04921, 117.07024, 105.07030, 103.05463, 93.07030, 91.05466, 79.05488   | Miscellaneous    |
| 49  | Methyl ferulate                                                                                                 | C <sub>11</sub> H <sub>12</sub> O <sub>4</sub>  | +       | 19.854      | -3.29          | 209.08017            | 208.0729      | 177.05435, 149.05963, 125.05978, 121.06503, 106.04172, 91.05474, 78.04709, 65.03938   | Phenylpropanoids |
| 50  | Selina-4(14),7(11)-dien-8-one                                                                                   | C <sub>15</sub> H <sub>22</sub> O               | +       | 20.744      | -3.7           | 219.17343            | 218.1663      | 201.16389, 163.11189, 161.13264, 149.09613, 123.11708, 111.08082, 107.08575, 95.08624 | Terpenoids       |
| 51  | 2-[(2'E)-3',7'-dimethyl-2',6'-octadienyl]-4-methoxy-6-methylphenol                                              | C <sub>18</sub> H <sub>26</sub> O <sub>2</sub>  | +       | 21.289      | -3.27          | 275.19962            | 274.1924      | 257.18979, 229.19518, 133.10126, 119.08578, 107.08574, 105.07025, 91.05483            | Polyacetylene    |

| No. | Name                                                                                 | Formula                                         | Ionmode | RT<br>[min] | Error<br>[ppm] | MS fragment<br>[m/z] | Calculate. MW | MS <sup>2</sup> fragments [m/z]                                                      | Classification |
|-----|--------------------------------------------------------------------------------------|-------------------------------------------------|---------|-------------|----------------|----------------------|---------------|--------------------------------------------------------------------------------------|----------------|
| 52  | 4-hydroxy-6-[2-(2-methyl-1,2,4a,5,6,7,8,8a-octahydronaphthalen-1-yl)ethyl]oxan-2-one | C <sub>18</sub> H <sub>28</sub> O <sub>3</sub>  | +       | 21.293      | -3.11          | 293.21011            | 292.2029      | 275.20056, 257.18918, 147.11691, 109.06512, 107.08605, 81.07047, 79.05496            | Lactones       |
| 53  | Caryophyllene oxide                                                                  | C <sub>15</sub> H <sub>24</sub> O               | +       | 21.493      | -3.59          | 221.18929            | 220.1819      | 203.17961, 175.14815, 163.14832, 161.13274, 147.11690, 109.10161, 95.08611, 81.07054 | Terpenoids     |
| 54  | 7-Demethylsuberosin                                                                  | C <sub>14</sub> H <sub>14</sub> O <sub>3</sub>  | +       | 22.087      | -3.2           | 231.10097            | 230.0936      | 175.03903, 163.03931, 131.04935, 119.04976, 91.05491, 69.07069, 53.00300             | Coumarins      |
| 55  | Pinosylvin                                                                           | C <sub>14</sub> H <sub>12</sub> O <sub>2</sub>  | +       | 22.103      | -2.81          | 213.09036            | 212.0831      | 167.08551, 109.02872, 103.05459, 91.0545, 81.03417                                   | Phenols        |
| 56  | Limonin                                                                              | C <sub>26</sub> H <sub>30</sub> O <sub>8</sub>  | +       | 22.179      | -1.59          | 471.20053            | 470.1933      | 453.19058, 139.03896, 111.04443, 93.03391                                            | Terpenoids     |
| 57  | Sedanolid                                                                            | C <sub>12</sub> H <sub>18</sub> O <sub>2</sub>  | +       | 22.38       | -2.56          | 195.13745            | 194.1302      | 177.12744, 149.13307, 135.04459, 107.08617, 93.07049, 81.07054, 67.05494             | Phthalides     |
| 58  | octadecatetraenoic acid                                                              | C <sub>18</sub> H <sub>28</sub> O <sub>2</sub>  | +       | 22.383      | -3.48          | 277.21512            | 276.208       | 259.20566, 163.11162, 161.13290, 133.10107, 119.08583, 93.07054, 81.07060, 79.05486  | Organic acids  |
| 59  | Arctigenin                                                                           | C <sub>21</sub> H <sub>24</sub> O <sub>6</sub>  | +       | 22.658      | -2.59          | 373.16339            | 372.1563      | 355.15503, 313.14279, 189.09081, 151.07533, 137.05975, 122.03642, 91.05475           | Lignans        |
| 60  | (4E,6E,12E)-tetradecatriene-8,10-diyne-1,3-diol-diacetate                            | C <sub>18</sub> H <sub>20</sub> O <sub>4</sub>  | +       | 23.341      | -2.47          | 301.14285            | 300.1354      | 183.08073, 153.06950, 128.06212, 115.05444, 91.05468, 83.04979, 65.03925, 55.05502   | Polyacetylene  |
| 61  | (9Z,11E,15Z)-13-hydroxy-9,11,15-octadecatrienoic acid                                | C <sub>18</sub> H <sub>30</sub> O <sub>3</sub>  | +       | 23.516      | -3.57          | 295.22571            | 294.2184      | 259.20779, 165.12743, 121.10123, 111.08066, 81.07054, 79.05496, 67.05501             | Organic acids  |
| 62  | Tetraneurin A                                                                        | C <sub>17</sub> H <sub>22</sub> O <sub>6</sub>  | +       | 23.77       | -2.88          | 323.14819            | 322.1407      | 203.10699, 155.07065, 95.04971, 79.05489, 69.03425, 67.05506, 55.01873               | Terpenoids     |
| 63  | Saussureamine B                                                                      | C <sub>20</sub> H <sub>27</sub> NO <sub>4</sub> | +       | 24.167      | -2.84          | 346.20035            | 345.193       | 231.13791, 213.12729, 163.07541, 116.07098, 79.05499, 70.06595, 69.07061             | Terpenoids     |
| 64  | (6E,12E)-Tetradecadiene-8,10-diyne-1,3-diol                                          | C <sub>14</sub> H <sub>18</sub> O <sub>2</sub>  | +       | 24.232      | -3.35          | 219.13716            | 218.13        | 201.12755, 147.08022, 131.08591, 117.07021, 91.05482, 69.03435, 67.05505             | Polyacetylene  |
| 65  | 7-phenyl-2-heptene-4,6-diyne-1-ol                                                    | C <sub>13</sub> H <sub>10</sub> O               | +       | 24.63       | -2.57          | 183.07991            | 182.0727      | 165.06970, 153.07001, 141.06985, 127.05453, 103.05456, 77.03942                      | Polyacetylene  |
| 66  | Atractyloyn                                                                          | C <sub>19</sub> H <sub>24</sub> O <sub>4</sub>  | +       | 24.774      | -2.24          | 317.1741             | 316.1668      | 199.11232, 157.06467, 10106036, 91.05487, 83.04984, 67.05494, 55.05516               | Polyacetylene  |

| No. | Name                                 | Formula                                        | Ionmode | RT<br>[min] | Error<br>[ppm] | MS fragment<br>[m/z] | Calculate. MW | MS <sup>2</sup> fragments [m/z]                                                       | Classification   |
|-----|--------------------------------------|------------------------------------------------|---------|-------------|----------------|----------------------|---------------|---------------------------------------------------------------------------------------|------------------|
| 67  | 1,7-bis(4-hydroxyphenyl)heptan-3-one | C <sub>19</sub> H <sub>22</sub> O <sub>3</sub> | +       | 24.779      | -2.9           | 299.16327            | 298.156       | 157.06470, 145.06479, 121.06526, 115.05467, 103.05462, 91.05483, 83.04986, 79.05495   | Phenols          |
| 68  | 5-Hydroxymethylfurfural              | C <sub>6</sub> H <sub>6</sub> O <sub>3</sub>   | +       | 24.809      | -0.86          | 127.03877            | 126.0316      | 109.02885, 99.04475, 85.02895, 81.03416, 71.04996, 67.01865, 53.00322                 | Miscellaneous    |
| 69  | Atractylenolide III *                | C <sub>15</sub> H <sub>20</sub> O <sub>3</sub> | +       | 25.01       | -4.02          | 249.14754            | 248.1403      | 231.13794, 189.09100, 185.13263, 163.07533, 149.06004, 105.07038, 93.07052, 69.07064  | Terpenoids       |
|     |                                      |                                                | -       | 25.001      | -1.73          | 247.13351            | 248.14082     | 203.14348, 187.11194, 147.07993                                                       |                  |
| 70  | Furanodienone                        | C <sub>15</sub> H <sub>18</sub> O <sub>2</sub> | +       | 25.014      | -4.06          | 231.13687            | 230.1297      | 213.12697, 175.07526, 163.07527, 161.05975, 119.08567, 95.08593, 93.07043, 69.07084   | Terpenoids       |
|     |                                      |                                                | -       | 24.889      | -2.14          | 229.12303            | 230.13019     | 179.03377, 122, 94,91                                                                 |                  |
| 71  | 4-Methoxycinnamaldehyde              | C <sub>10</sub> H <sub>10</sub> O <sub>2</sub> | +       | 25.015      | -2.14          | 163.07465            | 162.0677      | 161.05959, 135.08040, 131.04906, 115.05490, 107.04958, 105.07030, 91.05482, 79.05498  | Phenylpropanoids |
| 72  | 2-(biphenyl-4-yl)acetaldehyde        | C <sub>14</sub> H <sub>12</sub> O              | +       | 25.036      | -2.98          | 197.09546            | 196.0882      | 178.07758, 152.06200, 103.05472, 91.05478, 65.03915                                   | Miscellaneous    |
| 73  | 8-Epiiridodial glucoside             | C <sub>16</sub> H <sub>26</sub> O <sub>7</sub> | +       | 26.238      | -3.41          | 331.17407            | 330.1667      | 127.03918, 97.02892, 85.06548, 69.03432, 57.07081                                     | Terpenoids       |
| 74  | Atractylenolide II*                  | C <sub>15</sub> H <sub>20</sub> O <sub>2</sub> | +       | 26.345      | -3.78          | 233.15263            | 232.1455      | 215.14339, 189.14825, 177.09103, 151.07529, 133.06502, 105.07033, 95.08626, 81.07050  | Terpenoids       |
| 75  | Acetyltractylodinol                  | C <sub>15</sub> H <sub>12</sub> O <sub>3</sub> | +       | 26.39       | -3.27          | 241.08517            | 240.0779      | 213.09074, 199.07545, 198.06767, 169.06483, 171.08006, 147.04347, 93.03371, 81.03414  | Miscellaneous    |
| 76  | Atractylenolide I*                   | C <sub>15</sub> H <sub>18</sub> O <sub>2</sub> | +       | 27.147      | -2.71          | 231.13731            | 230.1301      | 213.12764, 185.13251, 157.10117, 143.08565, 142.07767, 131.08542, 129.07039, 95.08589 | Terpenoids       |

\*Identified by standard substances.



Table S2. List of the characteristic compounds to discriminate AC according to the geographical origin

| Model | Marker name                                          | VIP score | p(corr) value | Log <sub>2</sub> (FC) |
|-------|------------------------------------------------------|-----------|---------------|-----------------------|
| M2    | Chlorogenic acid                                     | 4.13      | -0.87         | 2.15                  |
|       | Isochlorogenic acid A                                | 1.40      | -0.93         | 2.14                  |
|       | 4,6,2',4'-Tetramethoxychalcone 2'-<br>beta-glucoside | 1.35      | -0.92         | 1.95                  |
|       | Isochlorogenic acid B                                | 1.27      | -0.92         | 1.85                  |
| M3    | Scopoletin                                           | 5.87      | -0.97         | 3.47                  |
|       | Atractylenolide II                                   | 1.88      | -0.81         | 1.79                  |
| M4    | L-Phenylalanine                                      | 4.38      | -0.96         | 2.40                  |
|       | L-Isoleucine                                         | 2.75      | -0.99         | 3.13                  |
|       | Guanine                                              | 1.25      | 0.84          | -7.48                 |
|       | L-Tyrosine                                           | 1.05      | -0.93         | 2.90                  |
| M5    | Adenosine                                            | 3.10      | -0.90         | 1.97                  |

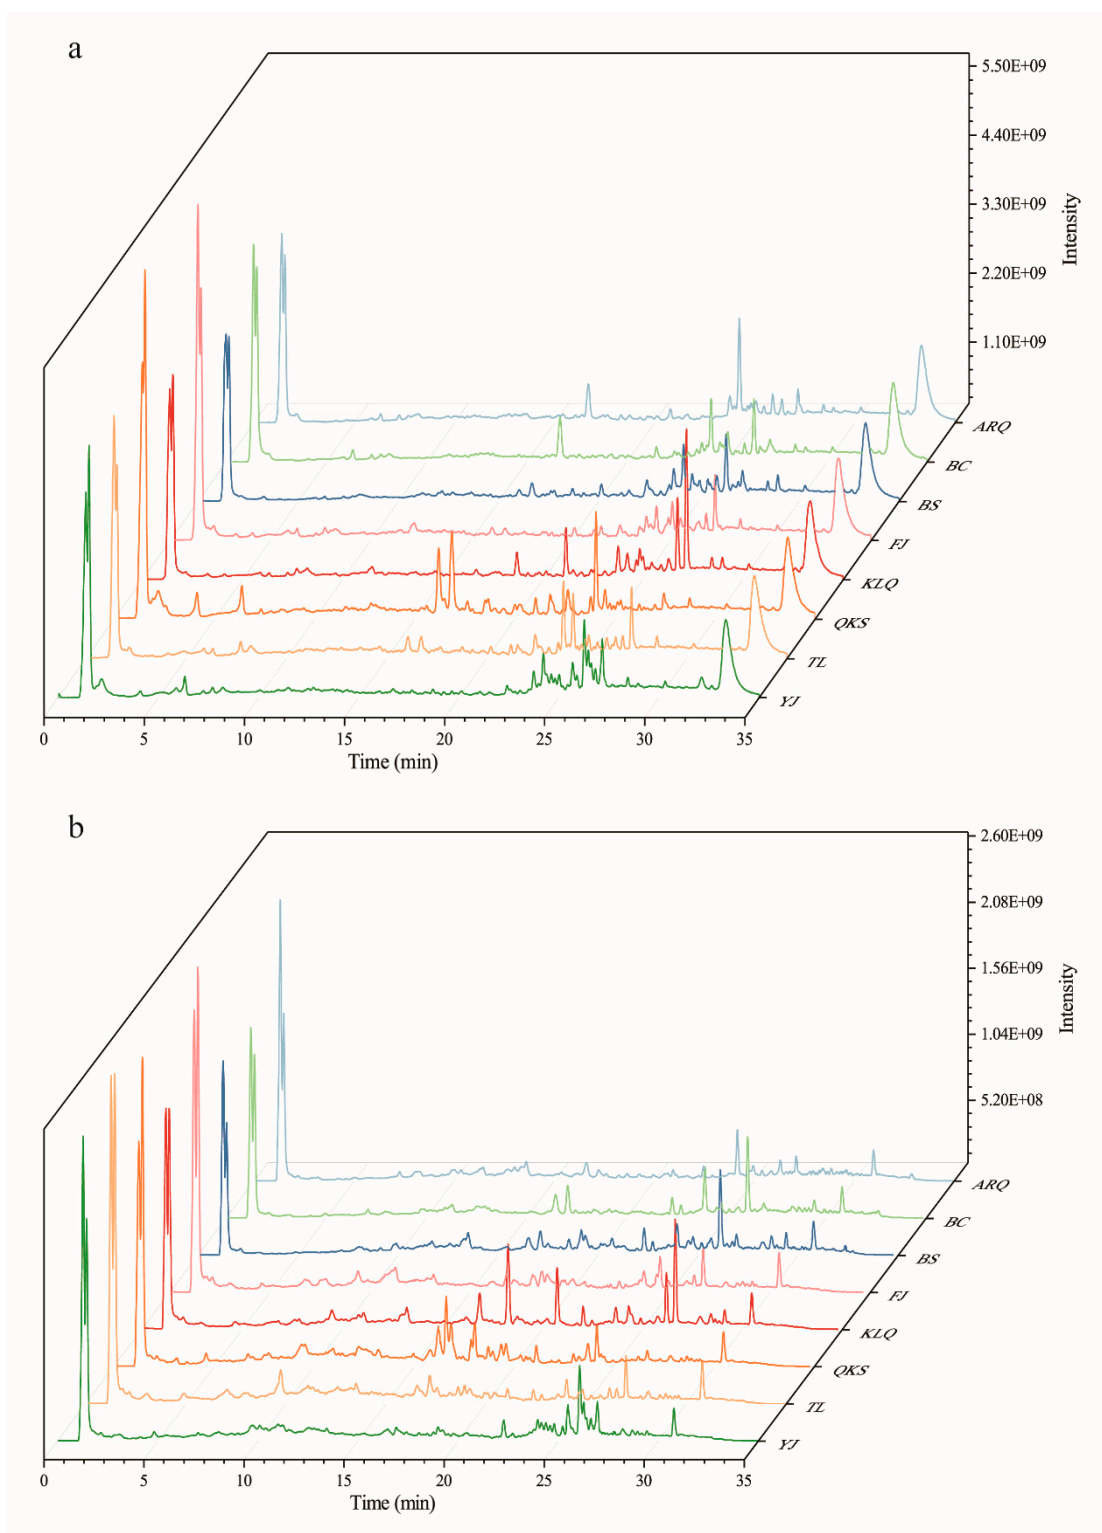

Figure S1. The total ion chromatograms of the UHPLC-Orbitrap-HRMS analysis of *Atractylodes chinensis* (DC.) Koidez. samples, with a focus on the (a) negative ion and (b) positive ion.

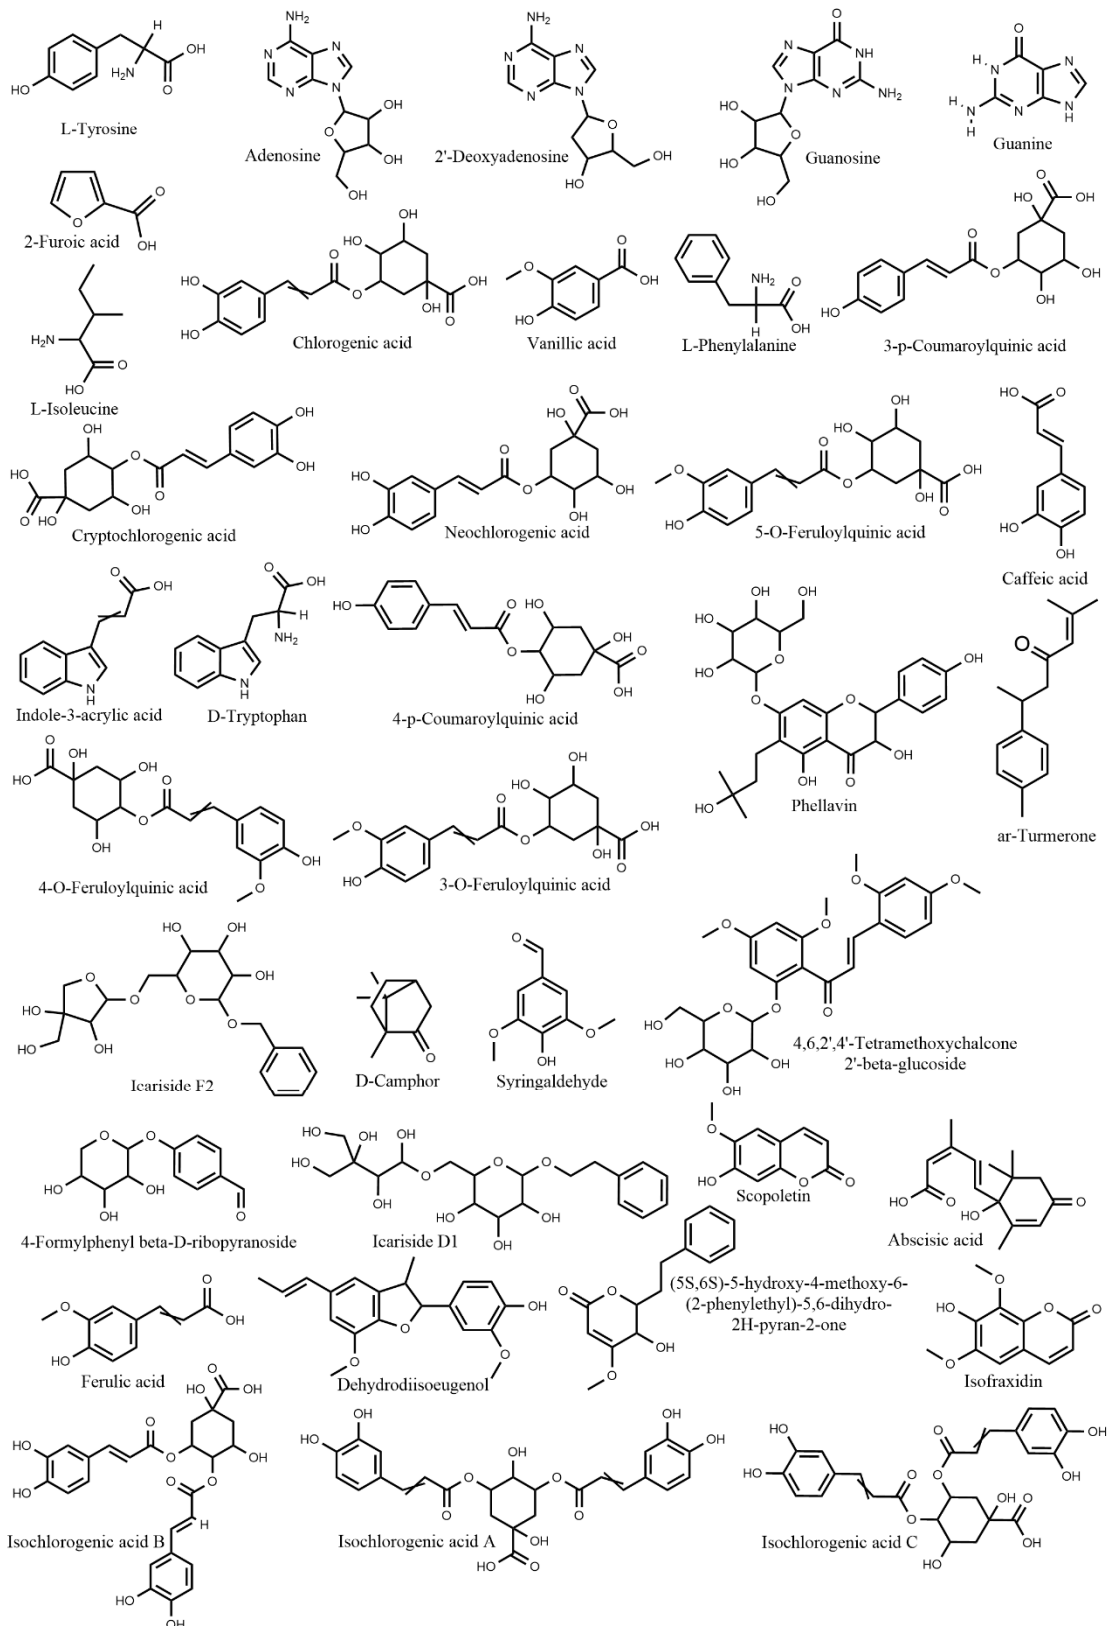

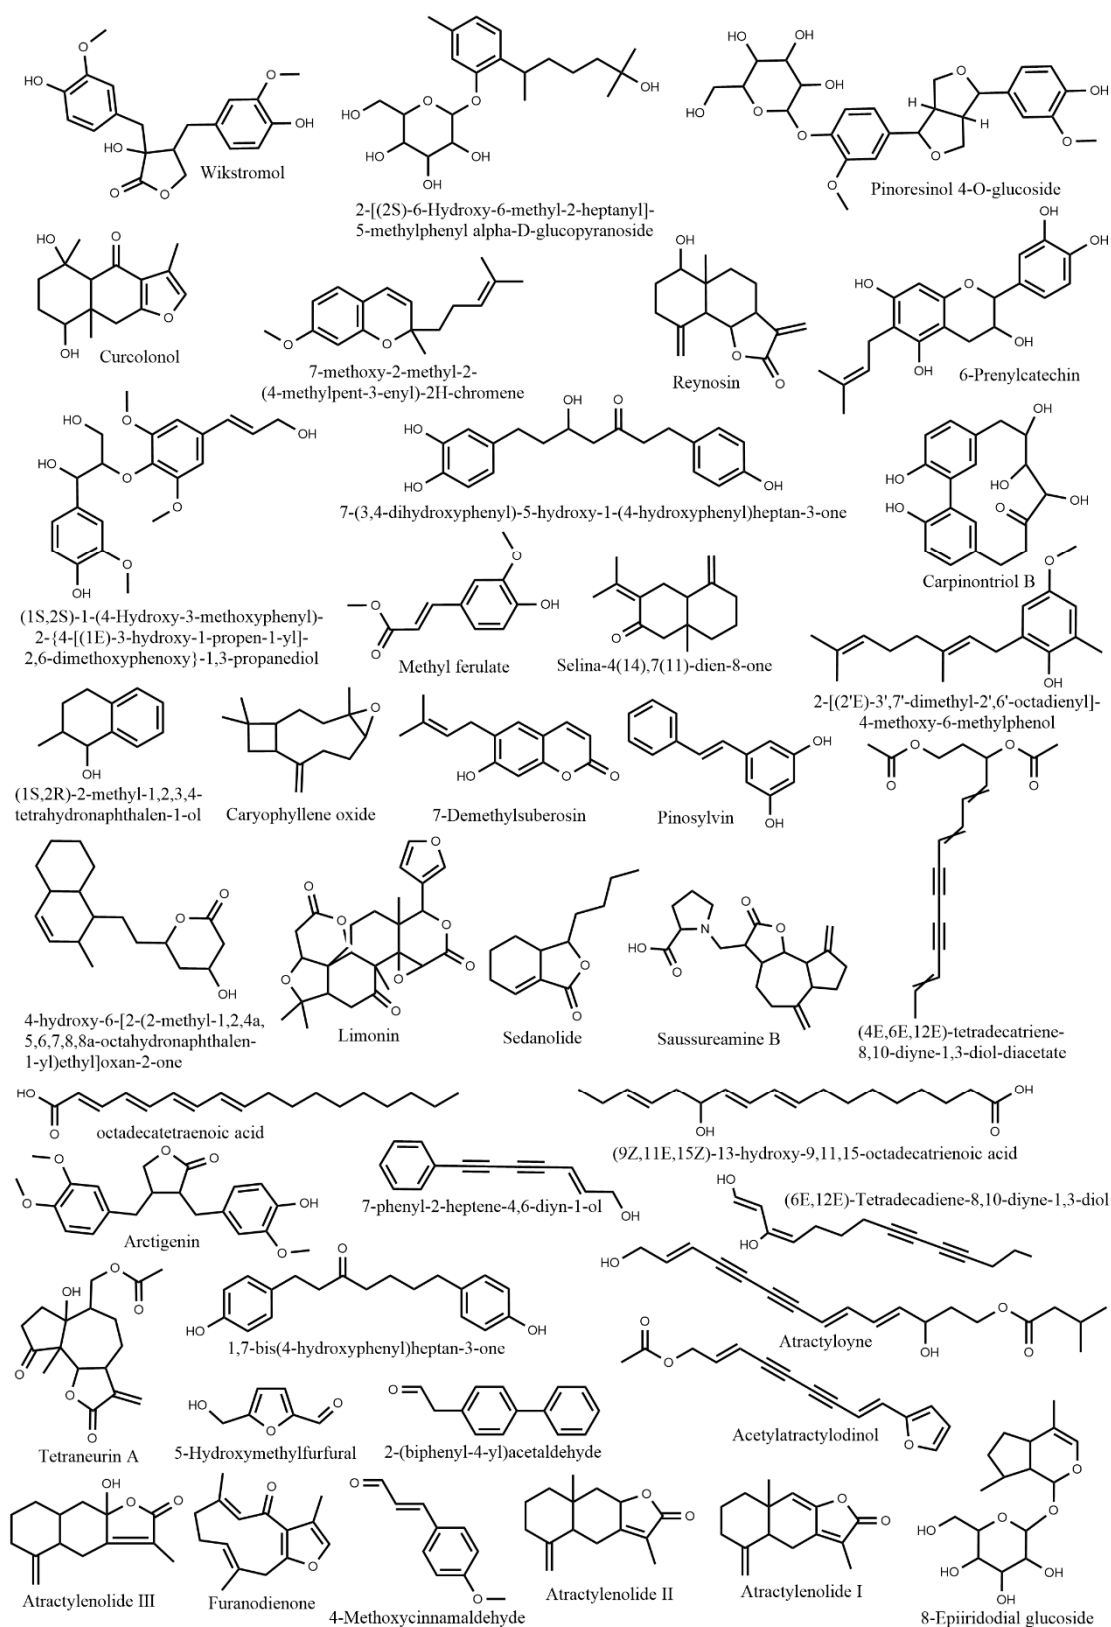

Figure S2. The chemical structure of 76 compounds identified in this study.

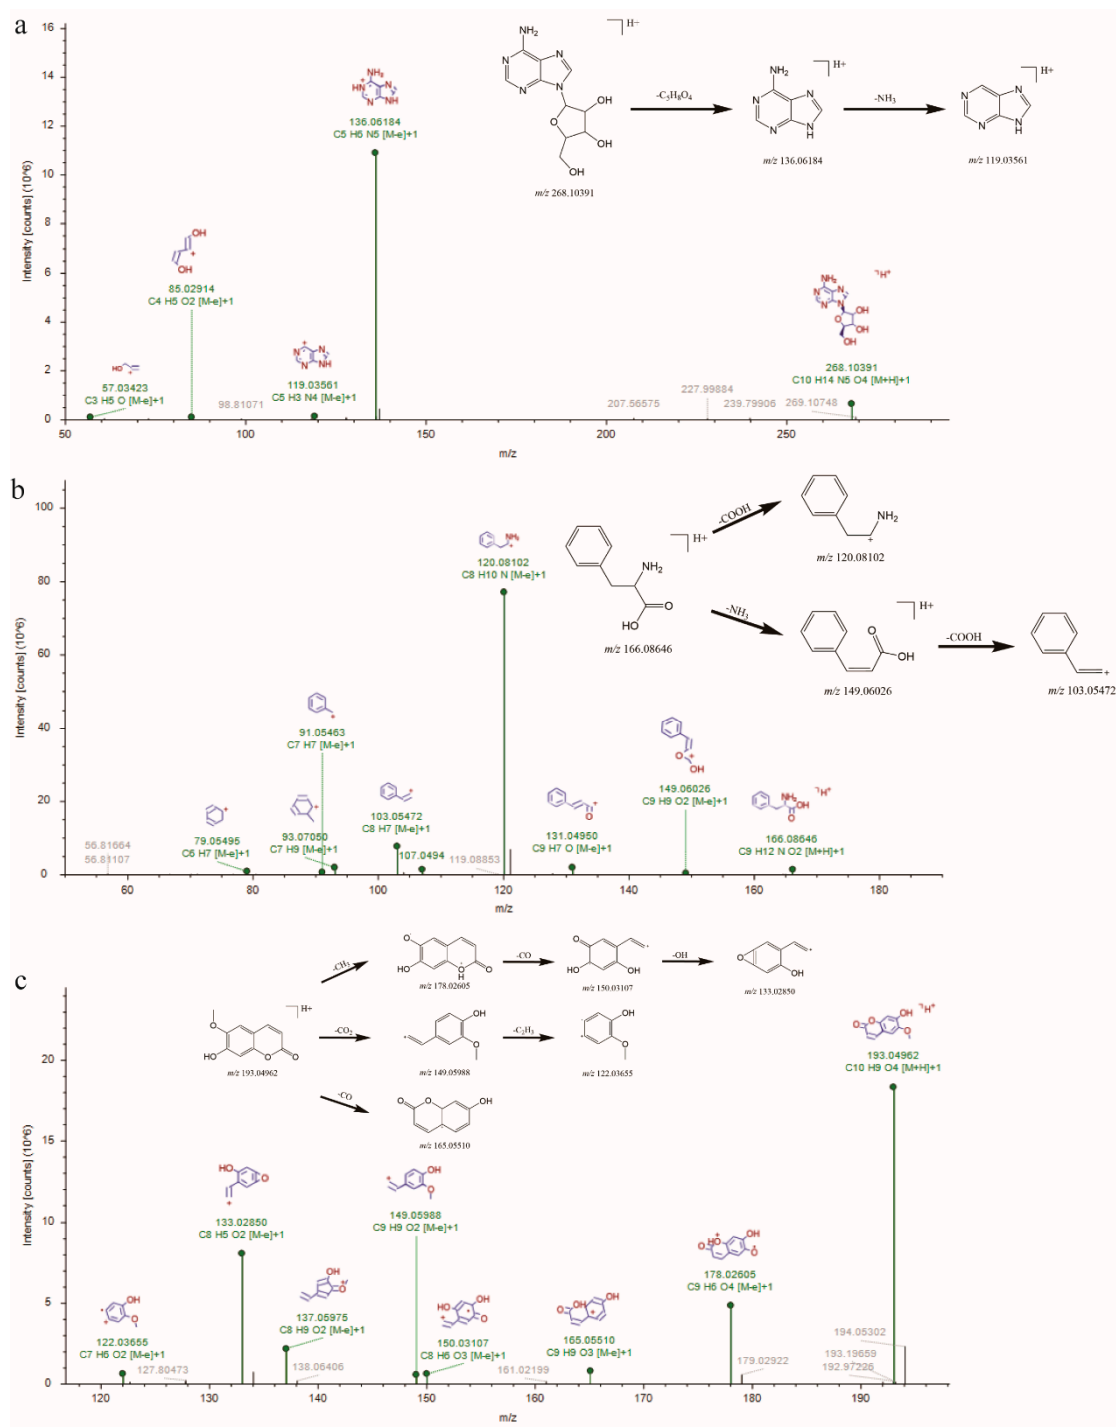

Figure S3. Mass spectrometric fragmentation patterns of (a) Adenosine, (b) L-Phenylalanine, and (c) Scopoletin.

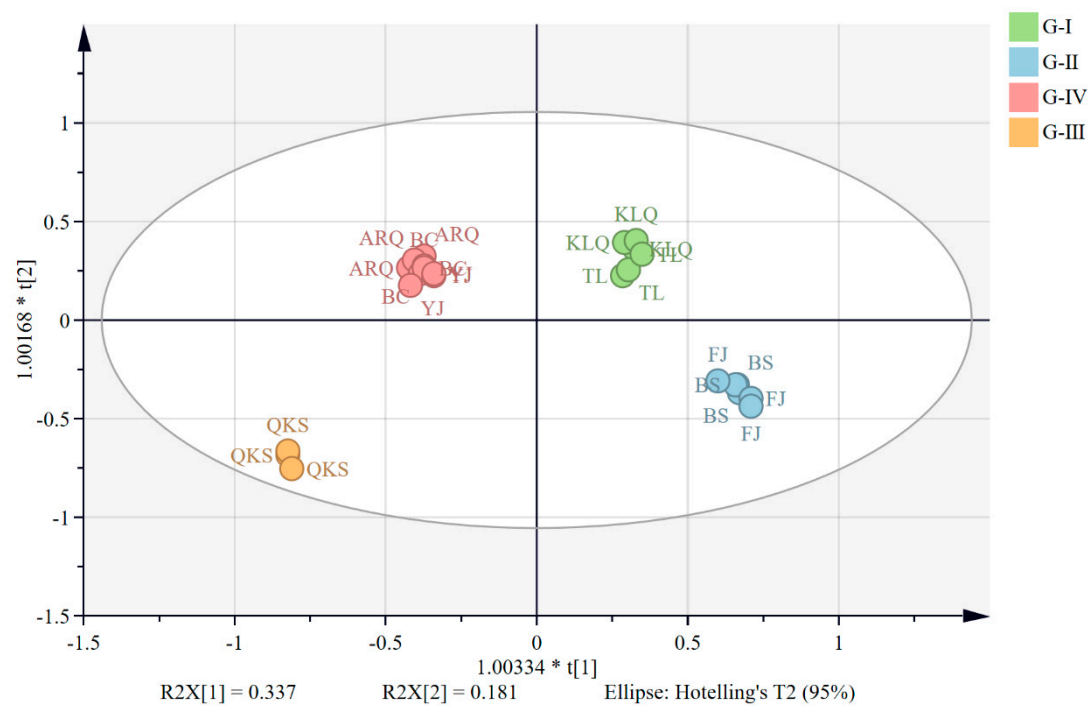

Figure S4. OPLS-DA results of AC from 8 different regions with grouping.
